# Supplementary material for: Evaluation of the introduction of QOF quality improvement modules in English general practice: early findings from a rapid, qualitative exploration of implementation
Source: HighWire-hosted journal article supplement (doi:10.1136/bmjoq-2022-001960), 2022-09-01
Supplement: bmjoq-2022-001960supp001_data_supplement.pdf [file bmjoq-2022-001960supp001_data_supplement.pdf]

**QOFQI Phase 1**  
**Interview Schedule - Practice Managers**

**Role/context:**

- 1 How long have you been a Practice Manager?
- 2 What is your involvement in QOF at your practice?

**General View**

- 3 Are you aware of the changes to the QOF? Are you aware of the introduction of the 2 new Quality Improvement modules and Personalised care adjust that replaced exception reporting April 2019?
- 4 What about other staff in the practice? Do they know about it?
- 5 What are your thoughts on the changes?
- 6 What about other staff in the practice?

**QI Modules Specific**

- 7 What are the plans of the practice to implement the QI modules?
- 8 - How are the plans going?
- 9 - What kinds of changes will be needed to accommodate QI activities in the practice?
- 10 - Do you think the practice has sufficient resources to implement and administer QI activities?
- 11 - What kind of support do you need to implement the QI modules?
- 12 - Likewise, do practice staff feel supported to implement the QI modules?
- 13 Do you have any concerns about implementing the modules?
- 14 - Can you envisage any factors that might particularly hinder you?
- 15 - Are there any factors that might be helpful to implementation?

**QOF General**

- 16 How do you/staff feel about the shift away from the standard metrics-based QOF indicators?
- 17 Do you/practice staff think that QOF is a suitable method for incentivising QI?
- 18 - If not why not?
- 19 - Do you have any thoughts on an alternative approach or system of incentivisation?

**Outcomes**

- 20 What do you think the impact of the changes will be for:
  - patients and on patient care?
  - staff?
- 21 **Are there any other issues about the QOF changes you would like to tell me about that we haven't covered today?**
- 22 Finally, is there anyone else in the practice we should be talking to about this, if so, please could we have their details?

***Thank you for talking to me, it's very much appreciated!***

Please could you tell us if you would mind us contacting you again for further information? No obligation.
